# Supplementary material for: Using Patient-Reported Outcomes in Dose-Finding Oncology Trials: Surveys of Key Stakeholders and the National Cancer Research Institute Consumer Forum
Source: PubMed Central journal article supplement (PMC9438918; doi:10.1093/oncolo/oyac117), 2022-06-28

## Supplementary Fig. S1: Survey map

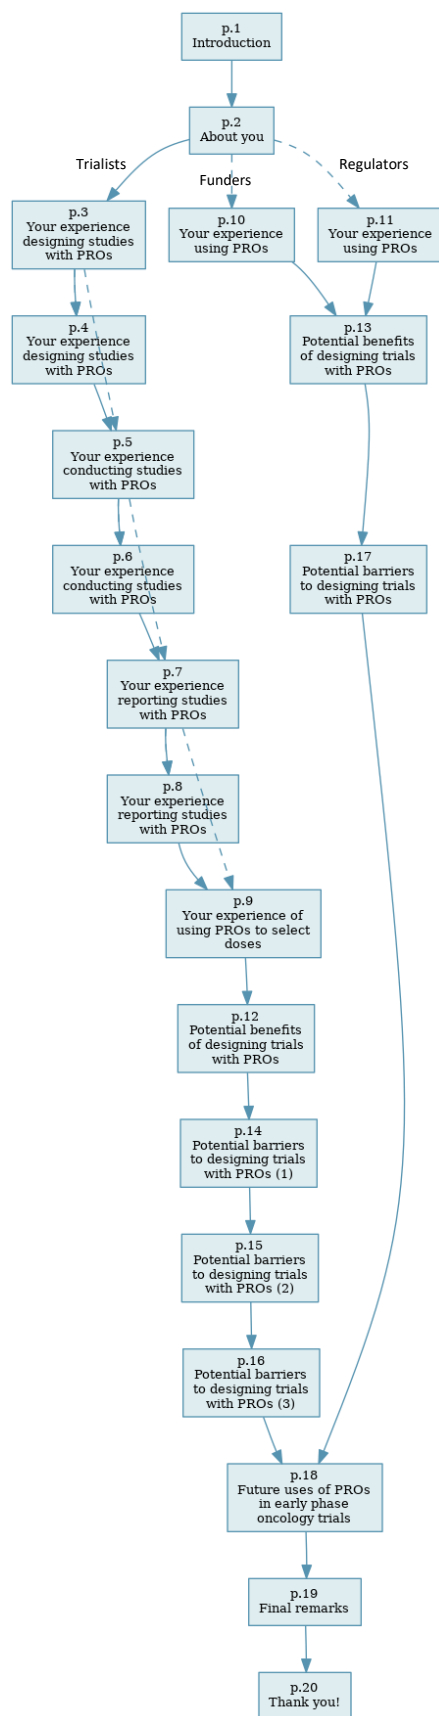

**Supplementary Fig. S2: Top 10 barriers according to clinicians, statisticians and trial managers/administrators**

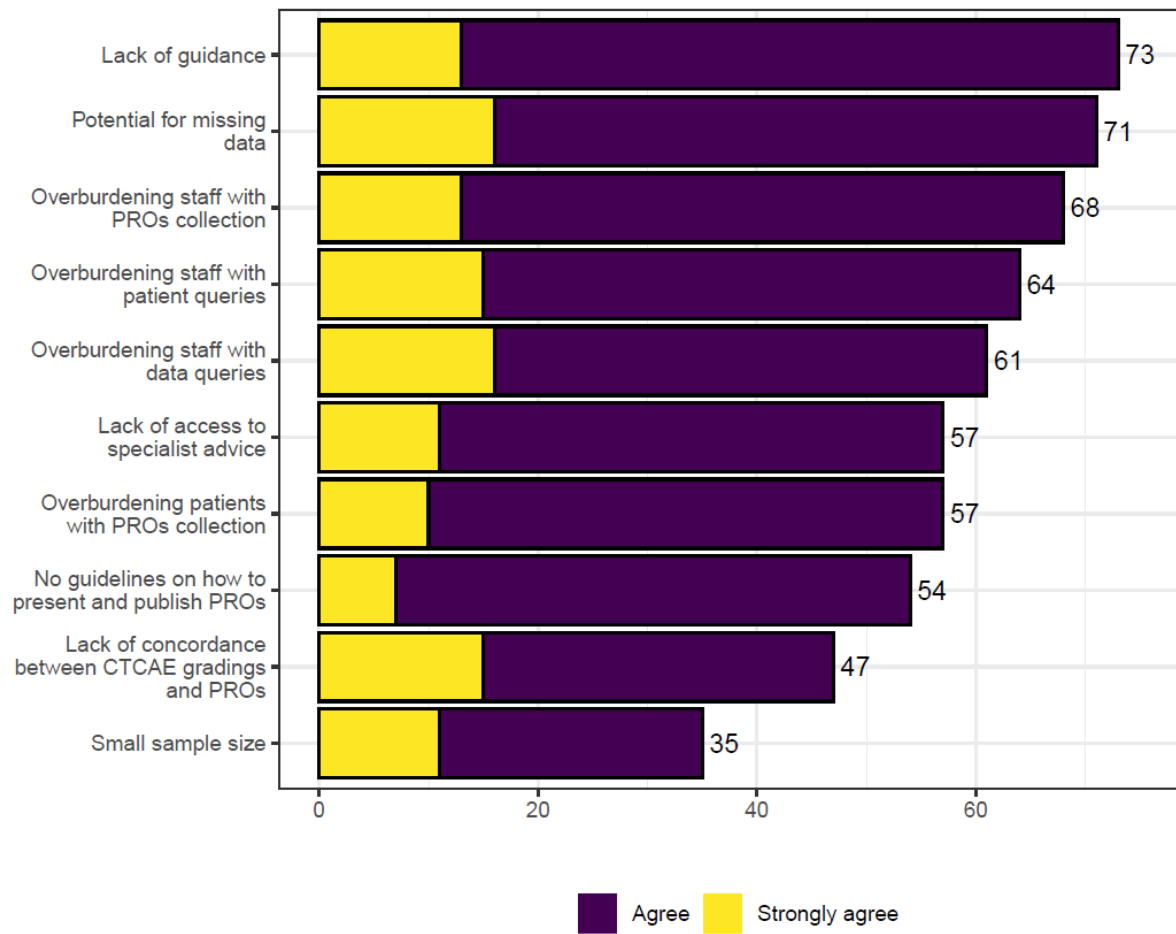

Supplement: oyac117_survey_supplementary_figures.pdf [file oyac117_survey_supplementary_figures.pdf]
